# Supplementary material for: A single-stage partial oxidation of methane to methanol: a step forward in the synthesis of oxygenates
Source: Royal Society of Chemistry journal article supplement (doi:10.1039/d1se00557j), 2021-01-01
Supplement: d1se00557j1.pdf [file d1se00557j1.pdf]

## **A single-stage methane to methanol: A step forward to the synthesis of oxygenates**

Piu Chawdhury, KVSS Bhargavi and Ch. Subrahmanyam\*

*Department of Chemistry, Indian Institute of Technology Hyderabad, Telangana 502 285, India,*

*Email: [csubbu@iith.ac.in](mailto:csubbu@iith.ac.in)*

### **Contents**

1. Formula of standard concentration curves
2. The standard formulas to calculate the conversion of reactant, yields (Y) and selectivity of the gaseous products (S) and liquid oxygenates (S<sub>i</sub>)
3. Particle distribution curves for all the materials
4. Discharge parameters calculation
5. Dielectric constant value measurement
6. CH<sub>4</sub> TPD study
7. Long term reaction stability
8. Spent NiO sample analysis
9. References

**1. Table S1. Formula of standard concentration curves.**

| Sample       | Equation                              | Adj. R square |
|--------------|---------------------------------------|---------------|
| Methanol     | $y = 1.37235E-7 \times x - 0.0005599$ | 0.99981       |
| Ethanol      | $y = 6.58505E-8 \times x - 0.01202$   | 0.99898       |
| Acetic acid  | $y = 1.09359E-7 \times x + 0.01624$   | 0.99993       |
| Acetone      | $y = 4.78846E-8 \times x - 0.00307$   | 0.99871       |
| Formaldehyde | $y = 2.06717E-5 \times x + 0.08029$   | 0.99855       |
| Formic acid  | $y = 1.47165E-5 \times x - 0.02457$   | 0.99967       |

**2. The standard formulas to calculate the conversion of reactant, yields (Y) and selectivity of the gaseous products (S) and liquid oxygenates (S<sub>i</sub>):**

$$CH_4 \text{ conversion (\%)} = \frac{\text{No. of moles of } CH_4 \text{ converted}}{\text{No. of moles of } CH_4 \text{ input}} \times 100 \quad (1)$$

$$\text{Selectivity of } CO_x(\%) = \frac{\text{No. of moles of } CO_x \text{ produced}}{\text{No. of moles of } CH_4 \text{ converted}} \times 100 \quad (2)$$

$$\text{Selectivity of } C_2H_6(\%) = \frac{2 \times \text{No. of moles of } C_2H_6 \text{ produced}}{\text{No. of moles of } CH_4 \text{ converted}} \times 100 \quad (3)$$

$$\text{Selectivity of } H_2(\%) = \frac{\text{No. of moles of } H_2 \text{ produced}}{2 \times \text{No. of moles of } CH_4 \text{ converted}} \times 100 \quad (4)$$

The selectivity of the liquid products can be calculated as:

$$\text{Total liquid oxygenates selectivity (\%)} = 100 - (S_{CO} + S_{CO_2} + S_{C_2H_6}) \quad (5)$$

$$S_i(\%) = \frac{n_i C_i}{\sum n_i C_i} \times eq (5)$$

$n_i$  = Carbon number in the liquid oxygenate, i

$C_i$  = moles of Carbon containing liquid oxygenate

$$\text{Yield of products (\%)} = \text{Selectivity} \times \text{CH}_4 \text{ conversion (\%)} \quad (7)$$

$$\begin{aligned} &\text{Energy efficiency for CH}_4 \text{ conversion (mmol/kJ)} \\ &= \frac{\text{CH}_4 \text{ converted (mmol/min)}}{\text{Discharge power (W)}} \times \frac{1000}{60} \end{aligned} \quad (8)$$

### 3. Particle distribution curves for all the materials

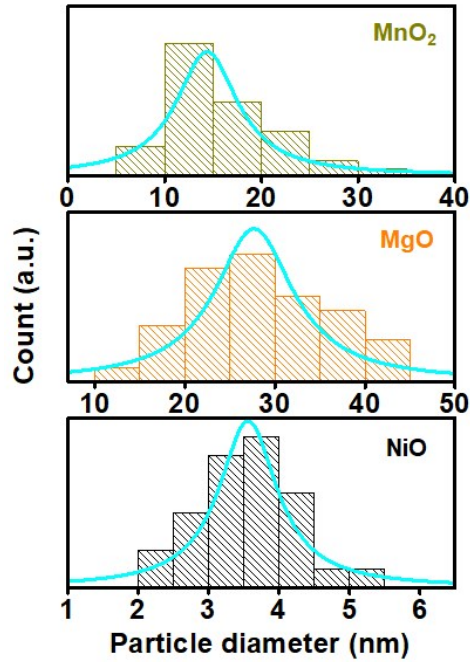

**Fig. S1.** Particle size distribution curves for NiO, MgO and MnO<sub>2</sub> nanoparticles.

### 4. Discharge parameters calculation

All the discharge parameters are calculated from Fig. S2 [1-2]. Here the cell capacitance can be presented as

$$\frac{1}{C_{cell}} = \frac{1}{C_d} + \frac{1}{C_g} \quad (1)$$

The break-down voltage can be calculated as

$$U_b = \frac{1}{1 + (C_g/C_d)} \times V_{min} \quad (2)$$

The average electric field for plasma only and catalyst packed plasma DBD system can be defined as

$$E \text{ (kV/cm)} = \frac{U_b}{d_{gap}} \quad (3)$$

$$E_{cat} \text{ (kV/cm)} = \frac{U_b}{d_{cat-gap}} \quad (4)$$

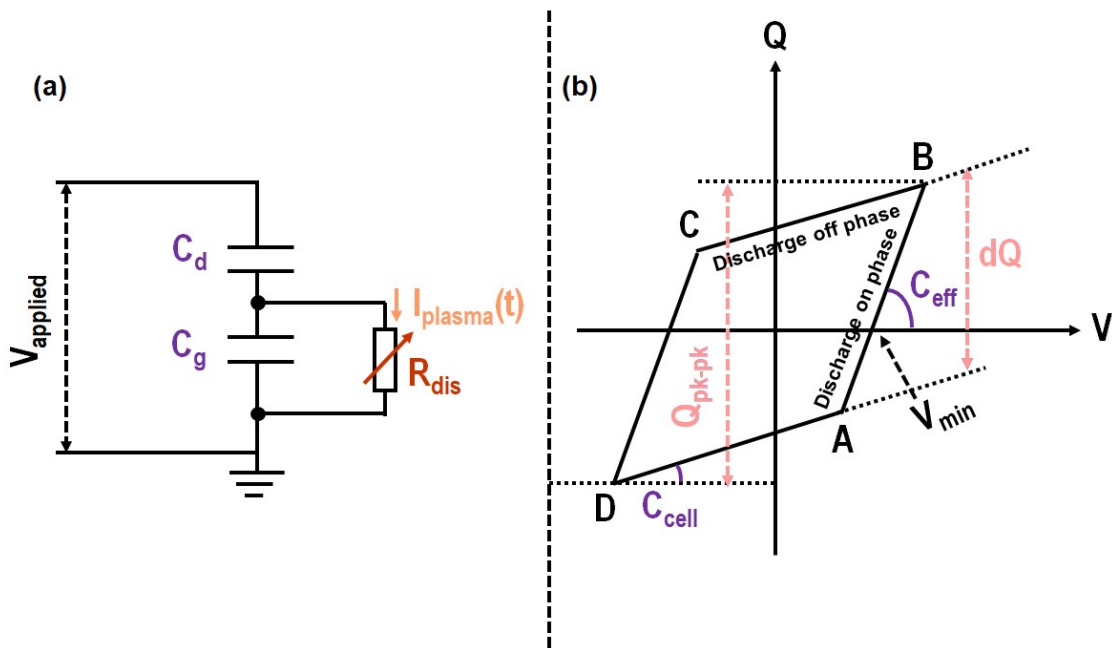

**Fig. S2.** (a) DBD circuit and (b) the corresponding Q-V Lissajous diagram.

## 5. Dielectric constant value measurement

An Impedance analyzer (Wayne Kerr 6500B) instrument was used to find out the dielectric constant of the synthesized materials. The measurement was performed at room temperature in the frequency range of 20 Hz -1 MHz.

Figure S3 shows the frequency dependent dielectric constant plot where the dielectric constant value of synthesized materials gets lower with increasing frequency and becomes almost constant

at higher frequency range. This effect can be attributed to the space charge polarization and dipolar polarization which cease with moving from lower to higher frequency range.

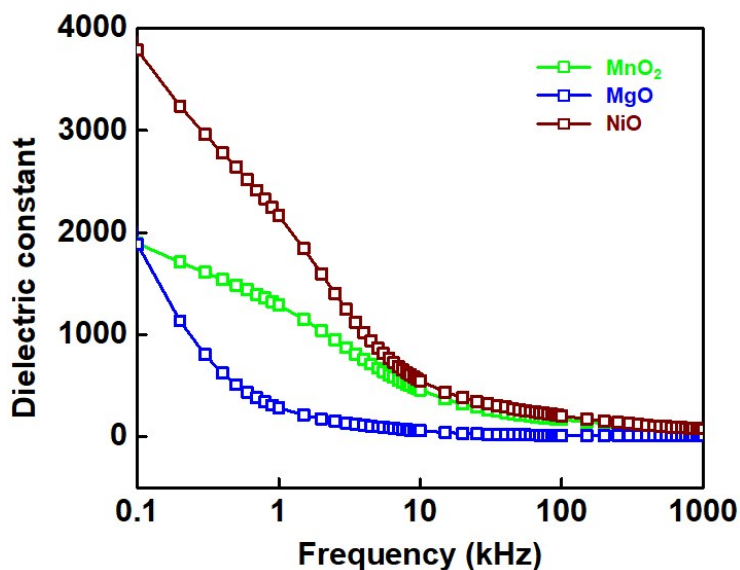

**Fig. S3.** Dielectric constant variation with frequency.

**Table S2.** Dielectric constant values of the synthesized materials with different frequency range.

| Sample           | Frequency (kHz) | Dielectric constant |
|------------------|-----------------|---------------------|
| MnO <sub>2</sub> | 100             | 166                 |
|                  | 1000            | 70.7                |
| MgO              | 100             | 12.6                |
|                  | 1000            | 6.4                 |
| NiO              | 100             | 203                 |
|                  | 1000            | 75.8                |

## 6. CH<sub>4</sub> TPD study

CH<sub>4</sub> TPD experiment was also studied to measure the interaction between CH<sub>4</sub> and MO<sub>x</sub> nanoparticles and the onset temperature for CH<sub>4</sub> desorption ( $T_{\text{onset}}$ ) was taken into consideration in this purpose. As observed from Fig. S4 the  $T_{\text{onset}}$  follows the order of NiO > MgO > MnO<sub>2</sub>, which implies that CH<sub>4</sub> is more strongly bound to the NiO surface as compared to other two, which may

increase the residence time of adsorbed CH<sub>4</sub> in the reaction zone. Therefore, the interaction probability of CH<sub>4</sub> increases which affects both the CH<sub>4</sub> conversion and products distribution.

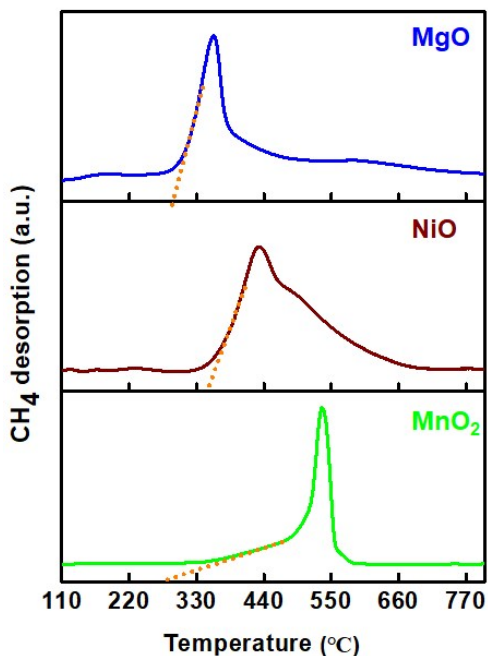

Fig. S4. CH<sub>4</sub> TPD profile of the MO<sub>x</sub> nanoparticles.

### 7. Long term reaction stability

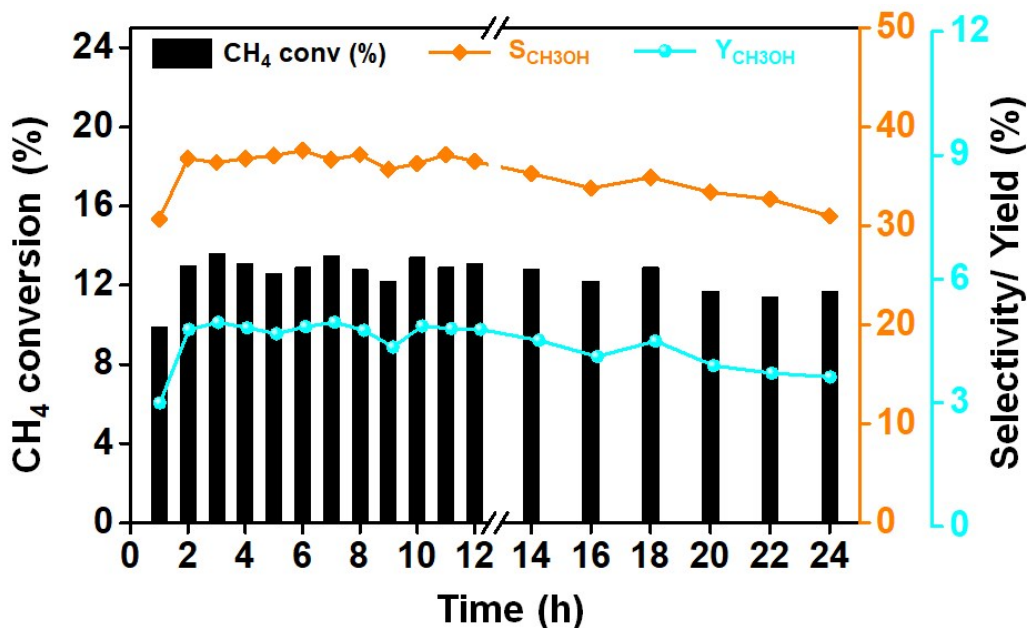

Fig. S5. The stability run of the reaction (CH<sub>4</sub>:O<sub>2</sub> = 5:1, SIE = 3.8 J/mL).

## 8. Spent NiO sample analysis

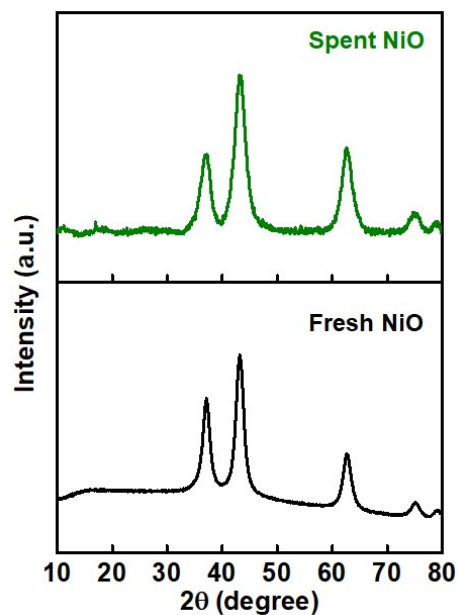

Fig. S6. XRD profiles of both fresh and spent NiO.

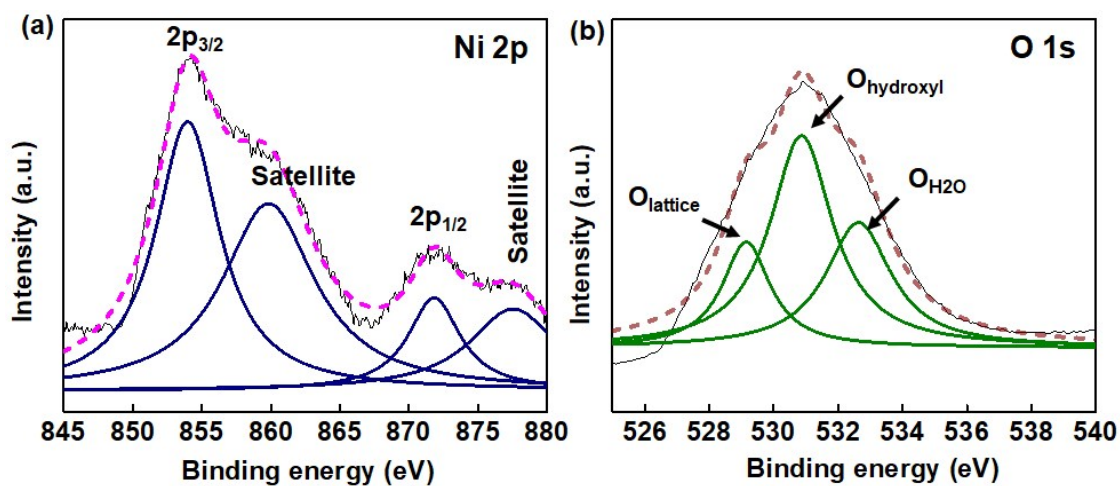

Fig. S7. XPS spectra recorded for spent NiO sample (a) Ni 2p and (b) O 1s.

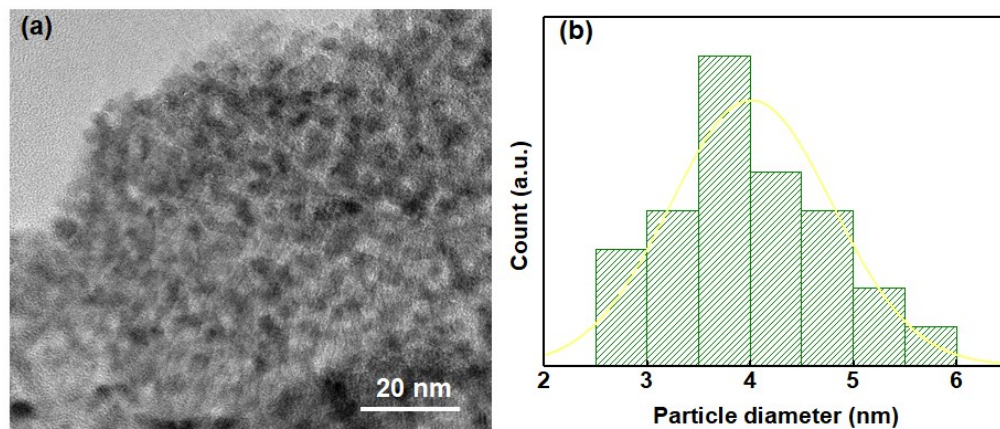

**Fig. S8.** (a) TEM image and (b) Particle size distribution curve for spent NiO sample.

## References

- [1] Y. Wang, M. Craven, X. Yu, J. Ding, P. Bryant, J. Huang, X. Tu, Plasma-enhanced catalytic synthesis of ammonia over a Ni/Al<sub>2</sub>O<sub>3</sub> catalyst at near-room temperature: insights into the importance of the catalyst surface on the reaction mechanism, *ACS catal.* 9 (2019) 10780-10793.
- [2] P. Chawdhury, Y. Wang, D. Ray, S. Mathieu, N. Wang, J. Harding, F. Bin, X. Tu, C. Subrahmanyam, A promising plasma-catalytic approach towards single-step methane conversion to oxygenates at room temperature, *Appl. Catal. B: Environ.* 284 (2020) 119735.
